# Supplementary material for: Evaluating basalt weathering for organic-inorganic ‘double carbon’ stabilization of the soil priming effect
Source: Research Square preprint supplement (doi:10.21203/rs.3.rs-2788961/v1), 2023-04-12
Supplement: Supplementary file 1 [file 8175b11137cbef7ef4d7c0d0.docx]

**
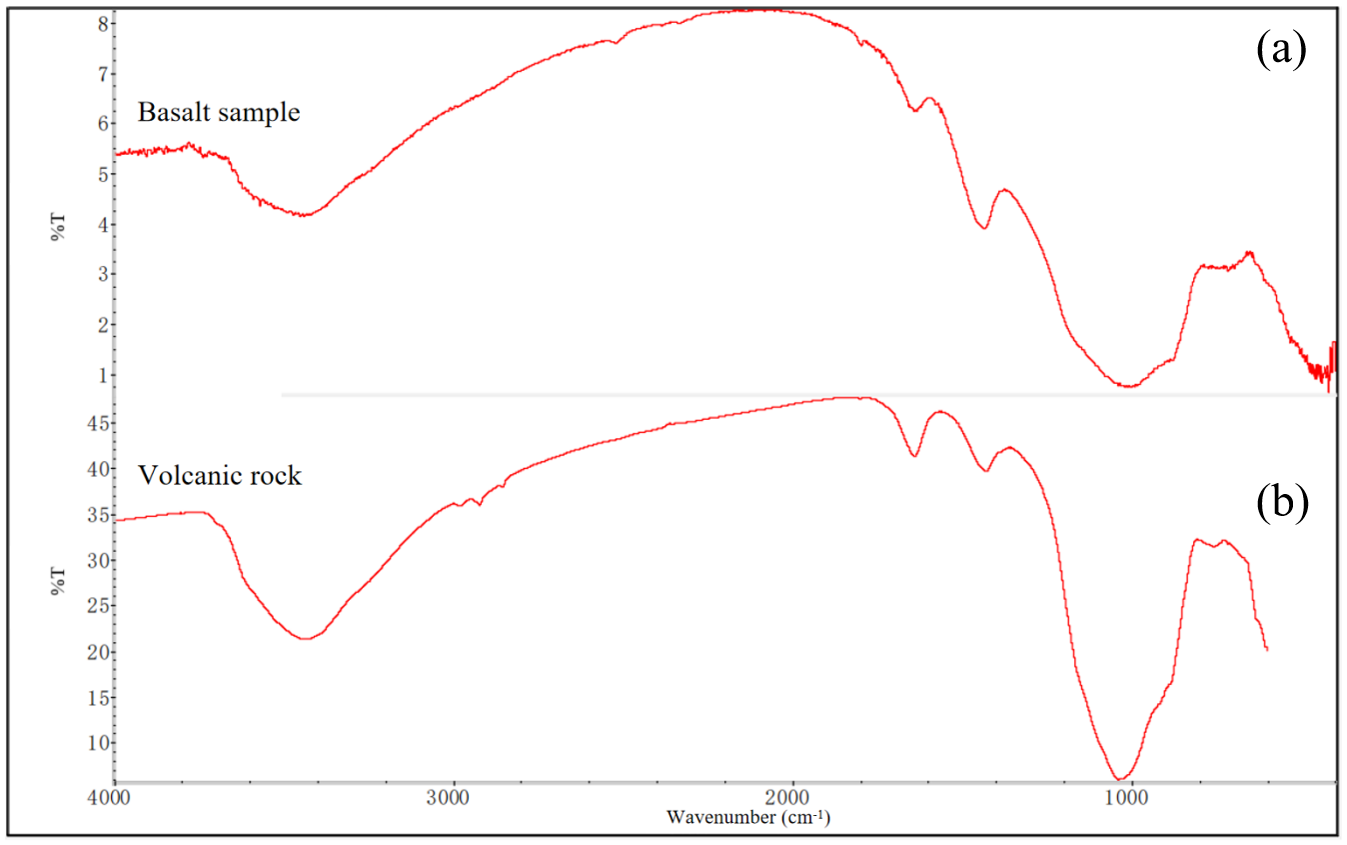
**

Fig.S.1 Infrared spectrum of basalt sample (a) and matching diagram (b)

**
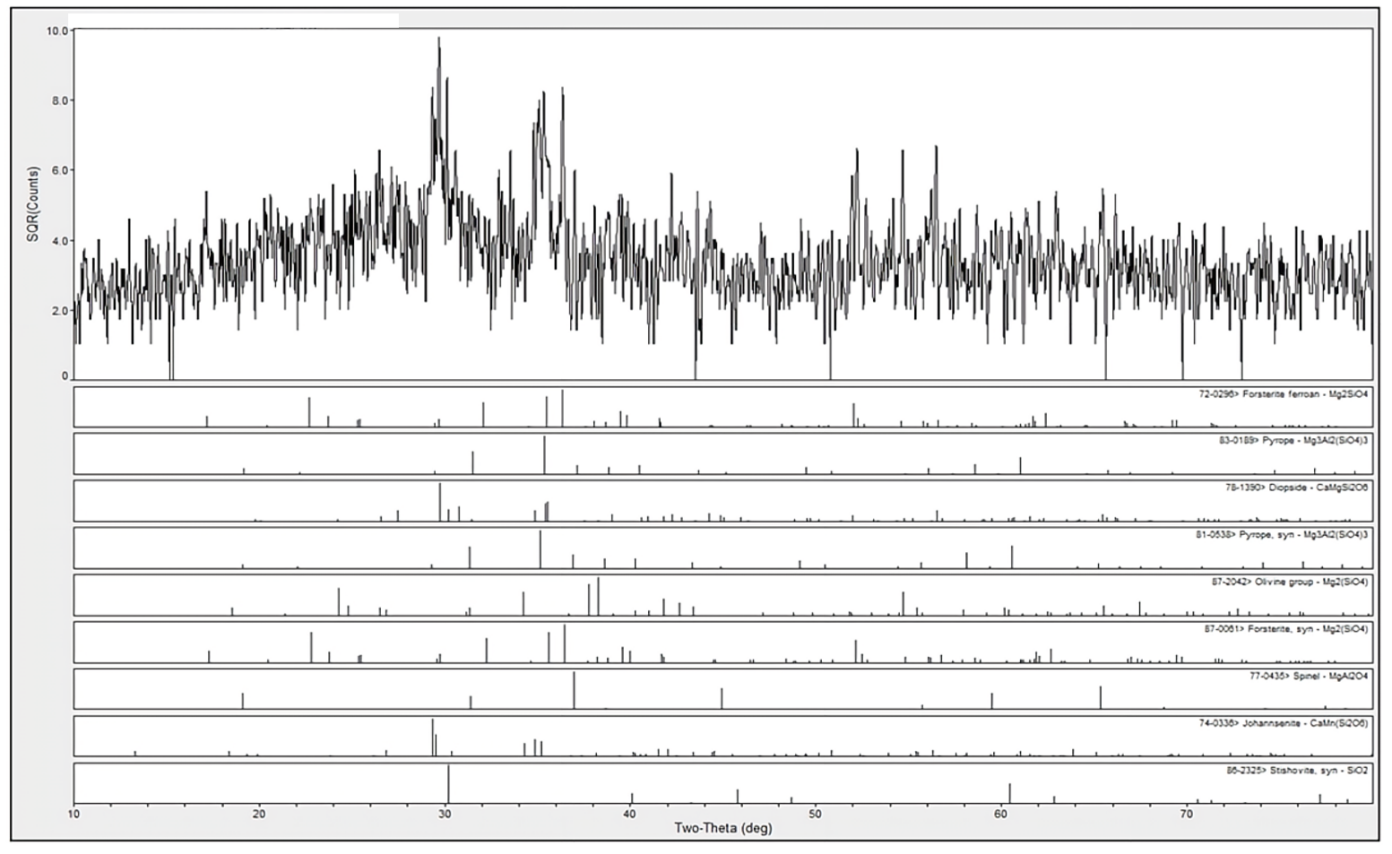
**

**Fig.S.3**

Fig.S.2 XRD spectrum of basalt sample

**
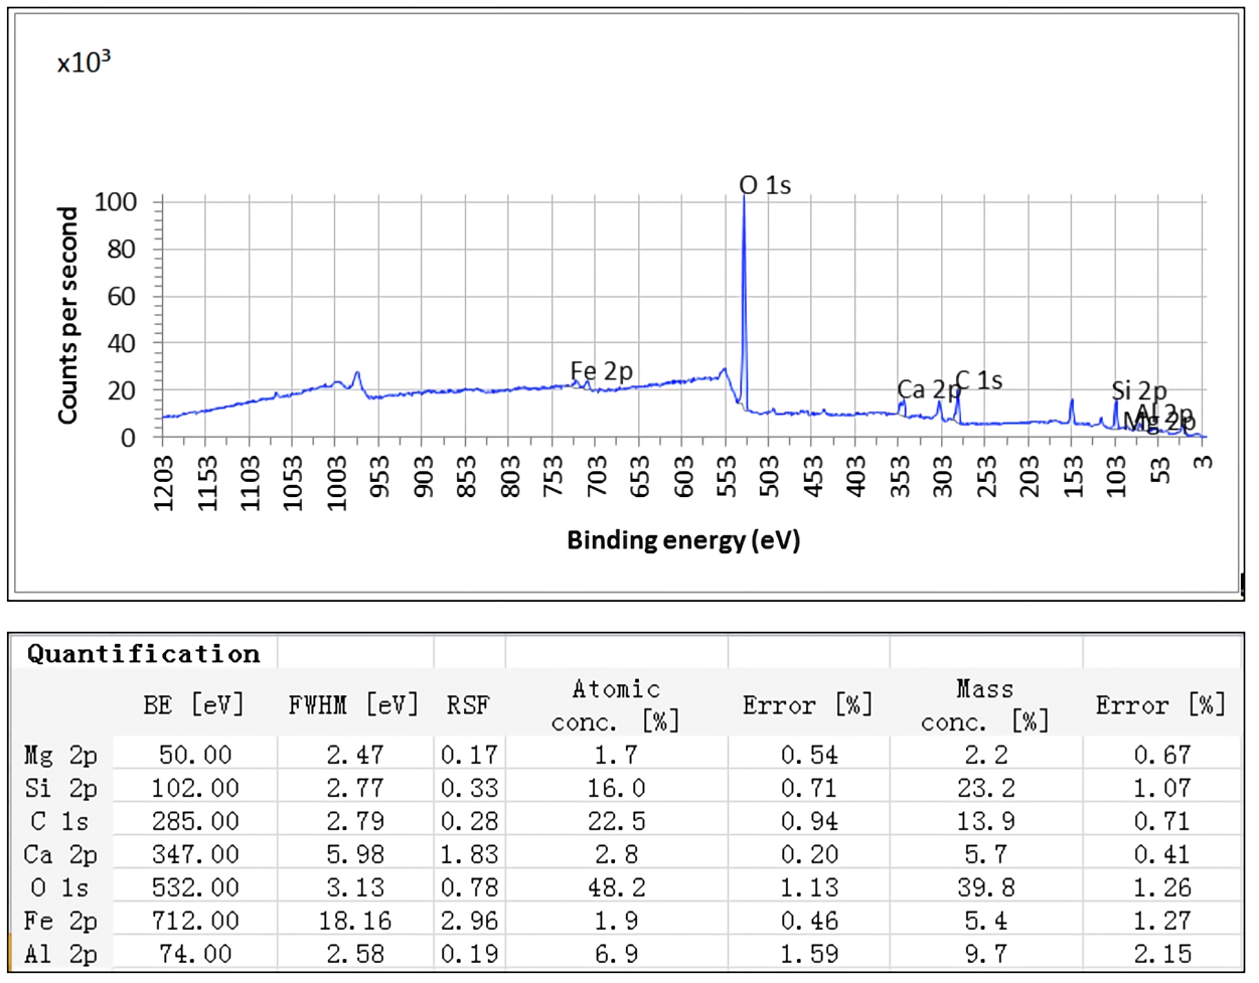
**

Fig.S.3 XPS test data diagram of basalt sample


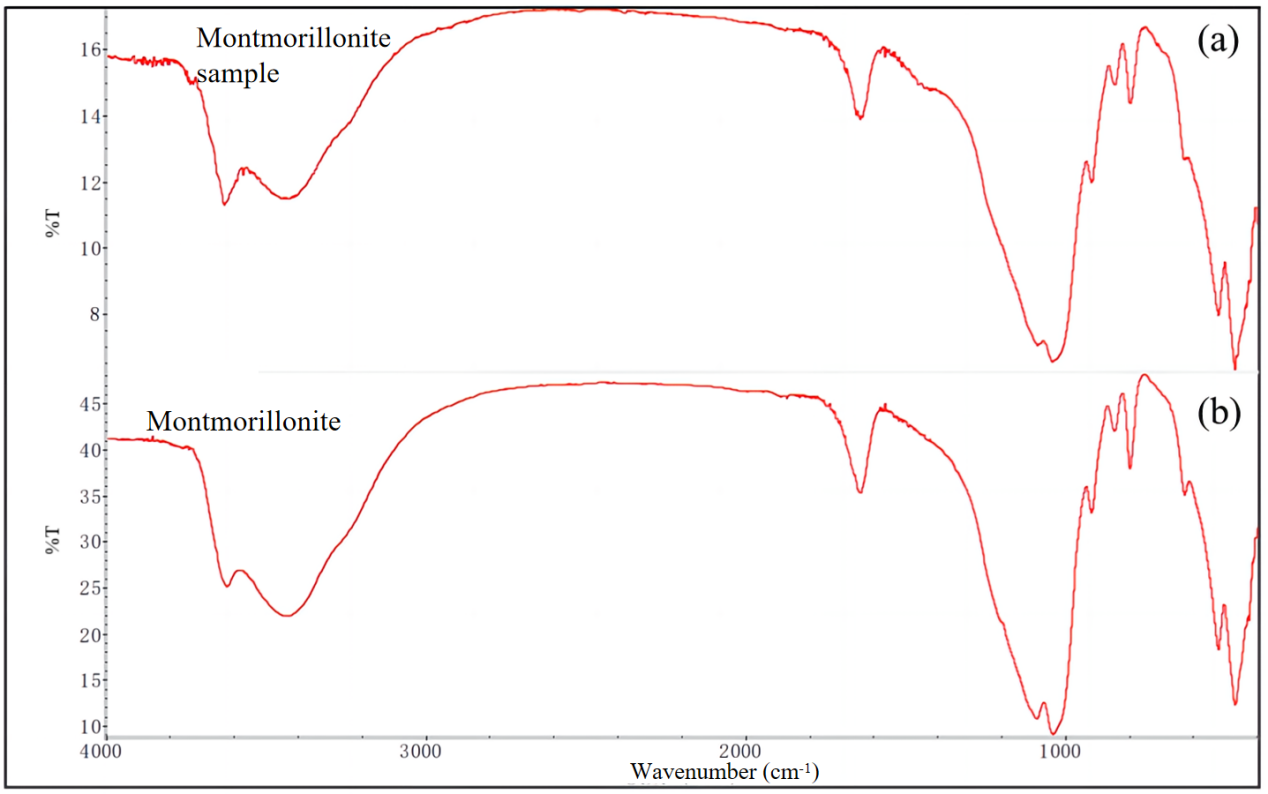


Fig.S.4 Infrared spectrum of montmorillonite sample (a) and matching diagram (b)

**Fig.S.5**


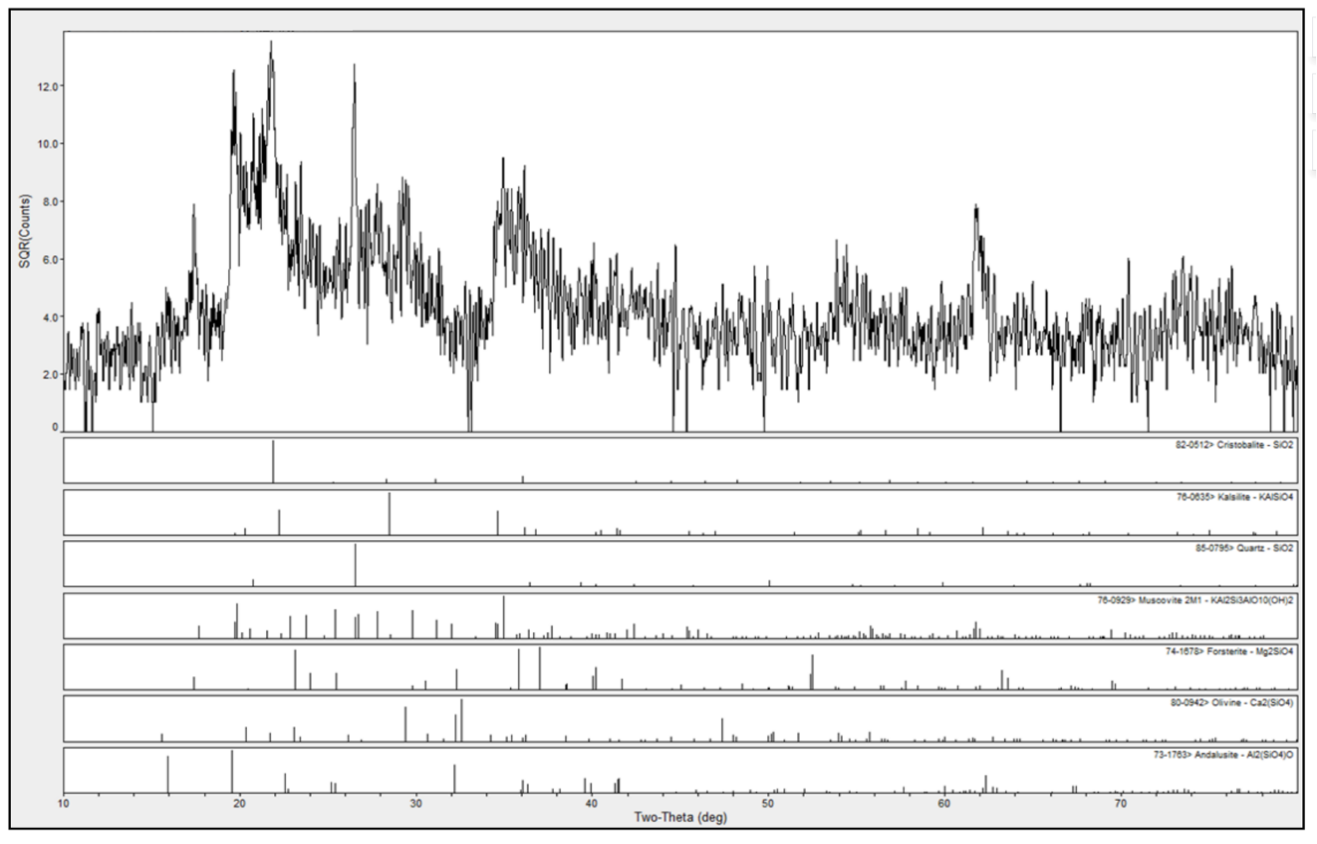


Fig.S.5 XRD spectrum of montmorillonite sample


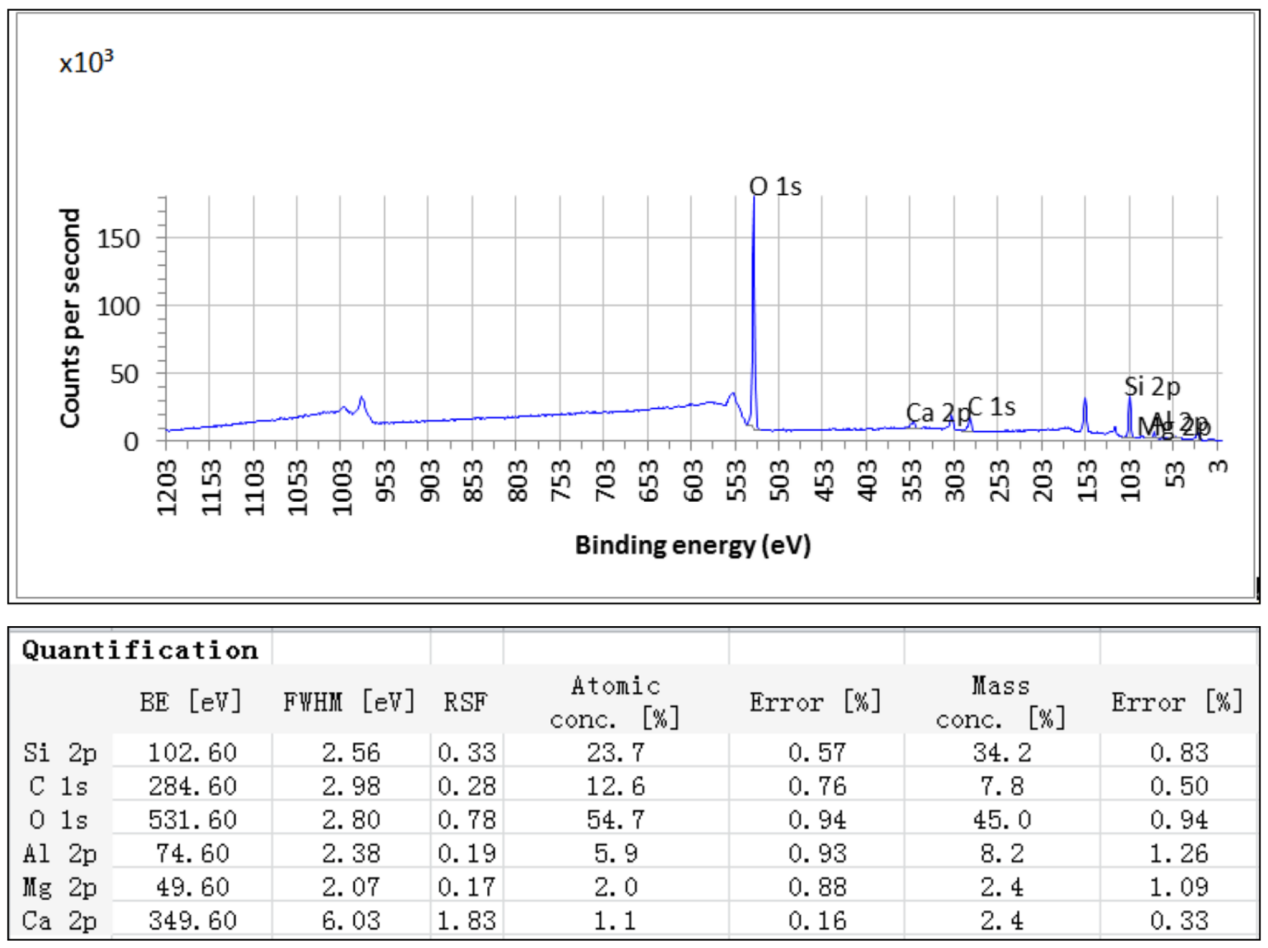


Fig.S.6 XPS test data diagram of montmorillonite sample

**
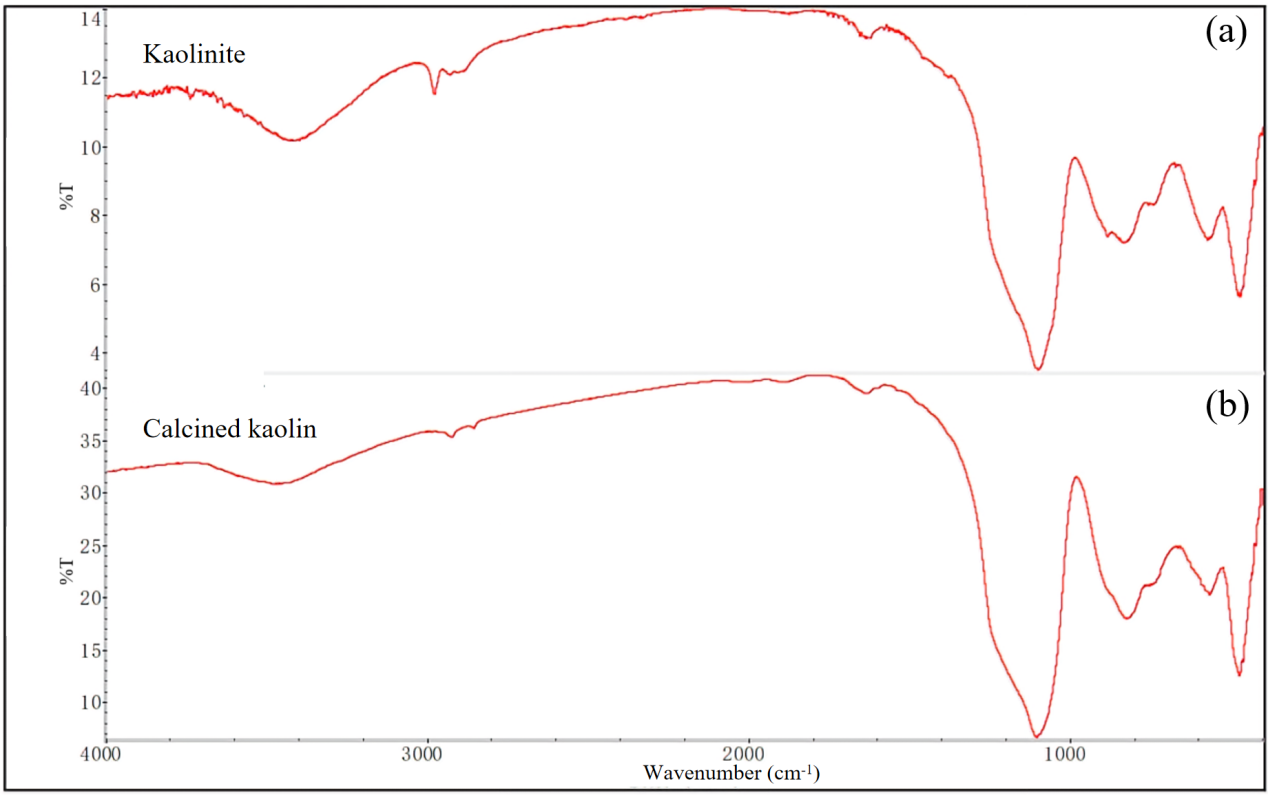
**

Fig.S.7 Infrared spectrum of kaolinite sample (a) and matching diagram (b).

**
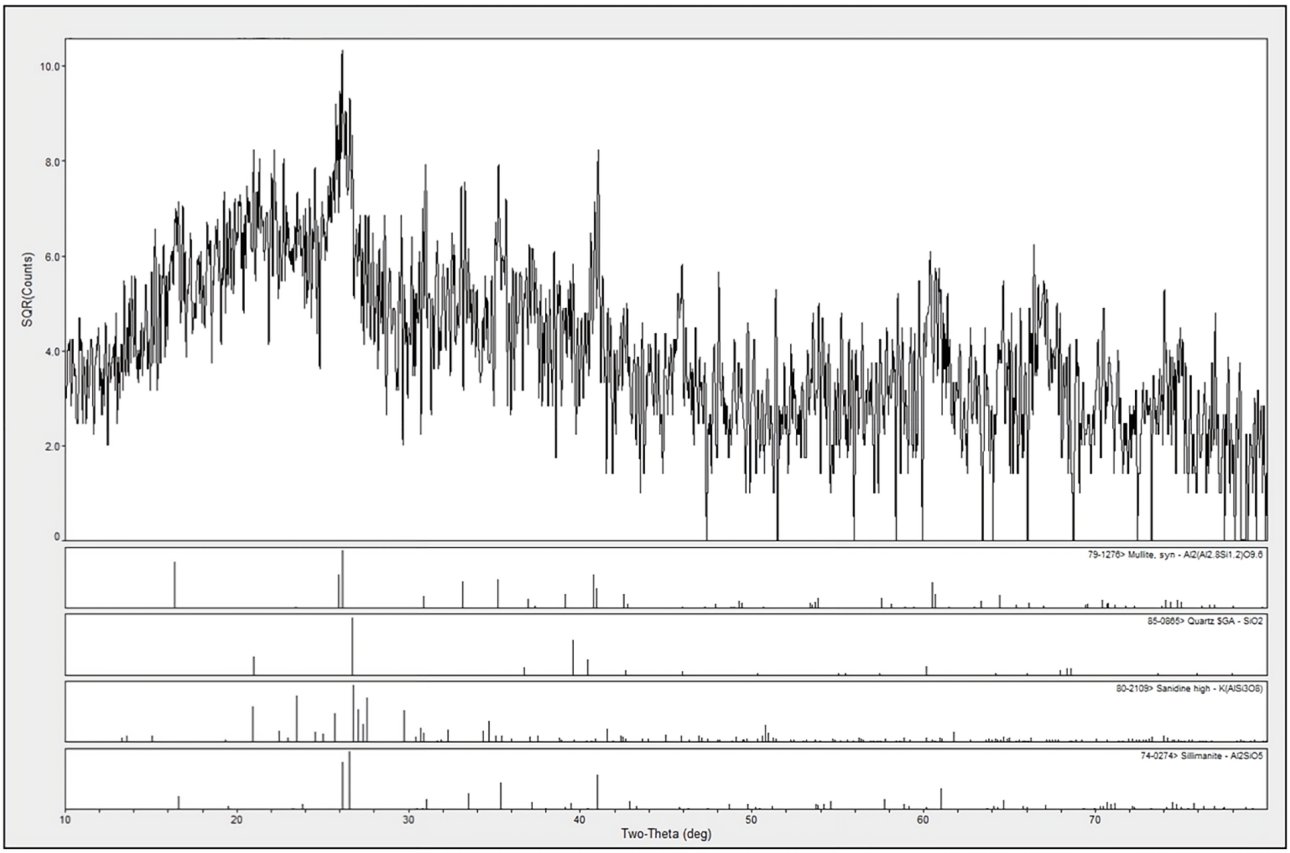
**

Fig.S.8 XRD spectrum of kaolinite sample

**
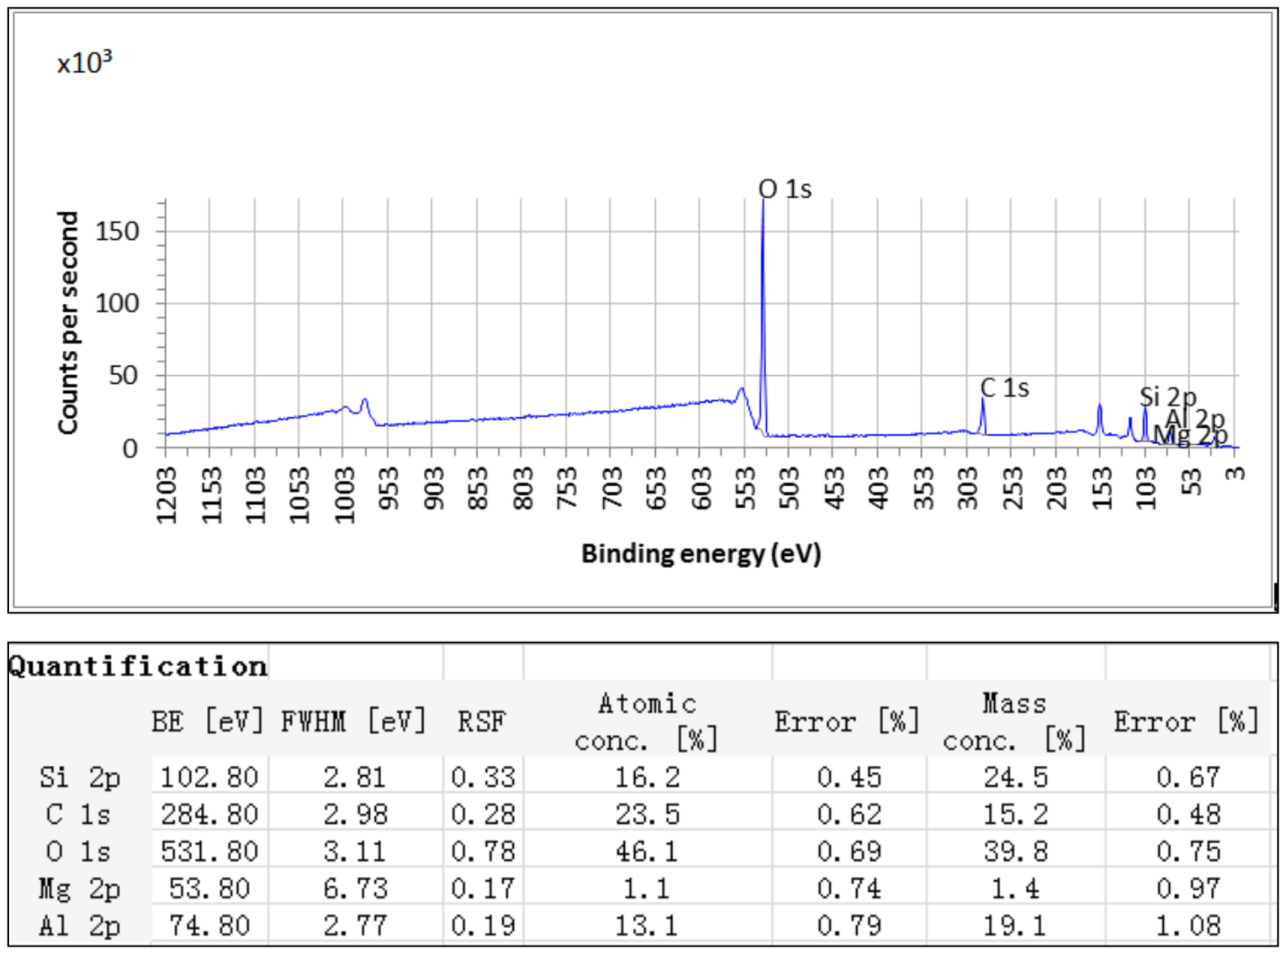
**

Fig.S.9 XPS test data diagram of kaolinite sample
